# Supplementary figures and images for: Development of in vitro microfluidic models to study endothelial responses to pulsatility with different mechanical circulatory support devices
Source: Royal Society of Chemistry journal article supplement (doi:10.1039/d4an00507d), 2024-01-01

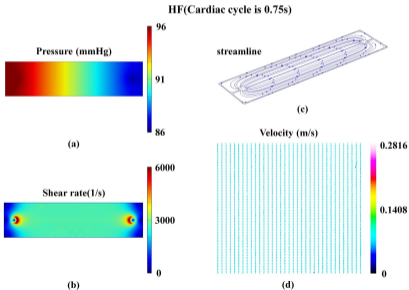

Supplement: d4an00507d3.pdf [file d4an00507d3.pdf]

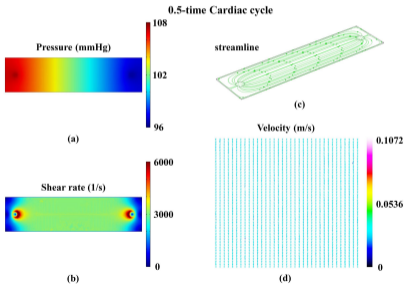

Supplement: d4an00507d4.pdf [file d4an00507d4.pdf]

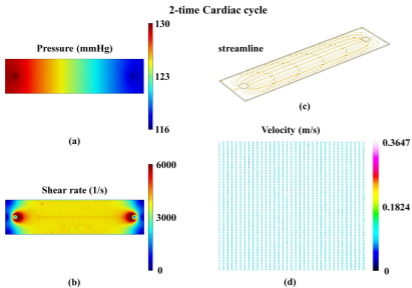

Supplement: d4an00507d5.pdf [file d4an00507d5.pdf]
